# Supplementary material for: Differences in the expression profiles of lncRNAs and mRNAs in partially injured anterior cruciate ligament and medial collateral ligament of rabbits
Source: PeerJ. 2022 Jan 12;10:e12781. doi: 10.7717/peerj.12781 (PMC8760859; doi:10.7717/peerj.12781)
Supplement: Supplemental Information 8 — For quantitative analysis of differential expression, data were processed by the 2−ΔΔCt method, and all lncRNA and mRNA expression was expressed as relative fold change to β-actin. All data in this table are the relative expression of genes. [file peerj-10-12781-s008.xlsx]

## Sheet: sheet1
	For quantitative analysis of differential expression, data were processed by the 2–ΔΔCt method，and all lncRNA and mRNA expression was expressed as relative fold change to β-actin. All data in this table are the relative expression of genes
	Gene	Normal group of ACL			Injured group of ACL
Figure a ACLNvsACLI	MSTRG.86040.7	1	1	1	0.517632	0.514057	0.535887
	MSTRG.24371.1	1	1	1	0.219151	0.22688	0.236514
	MSTRG.58645.12	1	1	1	0.173139	0.167241	0.183011
	MSTRG.27151.1	1	1	1	1.29235	1.23114	1.24833
	MSTRG.75325.14	1	1	1	1.3566	1.22264	1.42405
	MSTRG.87246.18	1	1	1	1.71713	1.79005	1.68179
	LPL	1	1	1	0.0616395	0.0629347	0.0688691
	COL6A6	1	1	1	0.432269	0.435275	0.366021
	PPP2R2B	1	1	1	0.137738	0.157127	0.108067
	LIF	1	1	1	1.89212	1.41421	1.87905
	IBSP	1	1	1	1.91853	2.08493	3.09513
	MMP9	1	1	1	1.48452	1.41421	1.12506
	Gene	Normal group of MCL			Injured group of MCL
Figure a MCLNvsMCLI	MSTRG.69384.5	1	1	1	0.122428	0.133046	0.145592
	MSTRG.86040.9	1	1	1	0.348686	0.30566	0.323088
	MSTRG.58645.12	1	1	1	0.737135	0.747425	0.697372
	MSTRG.25442.2	1	1	1	1.52626	1.6245	1.53688
	MSTRG.90026.2	1	1	1	2.20381	2.05623	1.87905
	MSTRG.27082.4	1	1	1	2.42839	2.53151	2.2974
	CACNA1D	1	1	1	0.246558	0.348686	0.251739
	HHIP	1	1	1	0.129408	0.138696	0.135842
	WNT10B	1	1	1	0.429283	0.438303	0.303549
	PIK3CD	1	1	1	2.49666	3.83706	3.05252
	RAC2	1	1	1	2.51403	1.91853	1.90528
	COL9A2	1	1	1	2.92817	2.25012	3.29436
	Gene	Normal group of MCL			Normal group of ACL
Figure a MCLNvsACLN	MSTRG.69384.5	1	1	1	0.558644	0.543367	0.535887
	MSTRG.102609.16	1	1	1	0.687771	0.619854	0.624165
	MSTRG.68818.7	1	1	1	0.269807	0.260616	0.34151
	MSTRG.22927.1	1	1	1	3.11666	3.01049	2.82843
	MSTRG.25430.16	1	1	1	2.28153	2.41162	2.42839
	MSTRG.24371.1	1	1	1	2.42839	2.88786	2.69447
	SMOC2	1	1	1	0.812252	0.870551	0.668964
	FGFR2	1	1	1	0.570382	0.655197	0.628507
	POSTN	1	1	1	0.607097	0.554785	0.632878
	CILP	1	1	1	7.67411	8.69388	8.05564
	SEMA3E	1	1	1	3.29436	3.43426	3.16017
	ZNF385B	1	1	1	8.33973	6.54322	6.63456
	Gene	Injured group of MCL			Injured group of ACL
Figure a MCLNvsMCLI	MSTRG.90336.3	1	1	1	0.888843	0.840896	0.870551
	MSTRG.45608.5	1	1	1	0.48971	0.496546	0.582367
	MSTRG.25442.2	1	1	1	0.840896	0.779165	0.795536
	MSTRG.41179.7	1	1	1	1.33793	1.22264	1.09429
	MSTRG.42937.5	1	1	1	1.77769	1.31951	1.51572
	MSTRG.32775.12	1	1	1	2.01391	1.91853	1.87905
	MFAP4	1	1	1	0.204476	0.178006	0.189465
	TBX3	1	1	1	0.0612138	0.131215	0.0688691
	FBLN5	1	1	1	0.217638	0.266093	0.228458
	ITGB8	1	1	1	2.32947	2.54912	3.16017
	HHIP	1	1	1	1.75321	1.95884	1.67018
	ZNF385B	1	1	1	4.08405	3.09513	4.56305
