# Supplementary material for: Differences in the expression profiles of lncRNAs and mRNAs in partially injured anterior cruciate ligament and medial collateral ligament of rabbits
Source: PeerJ journal article supplement (doi:10.7717/peerj.12781), 2022-01-12

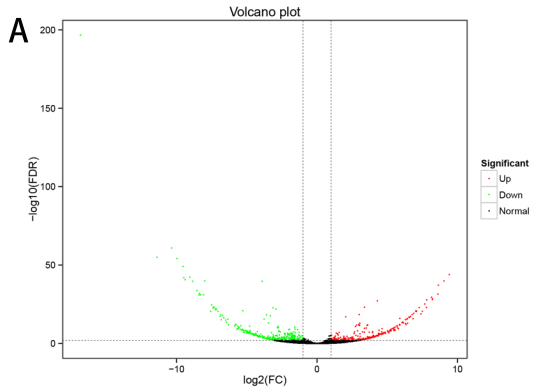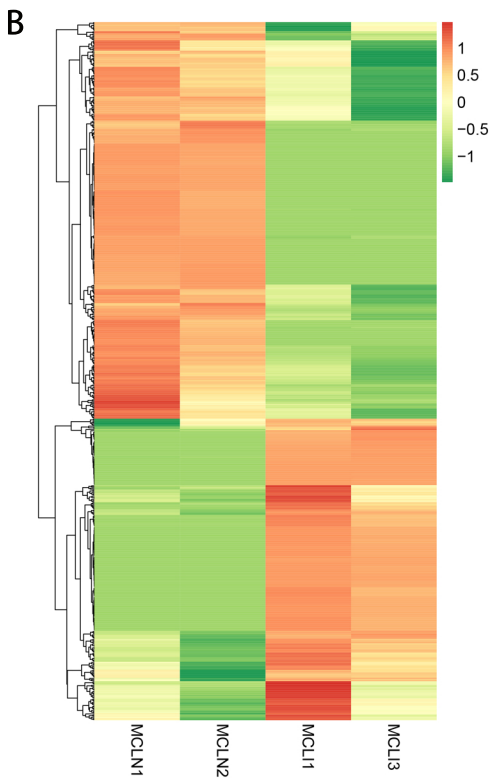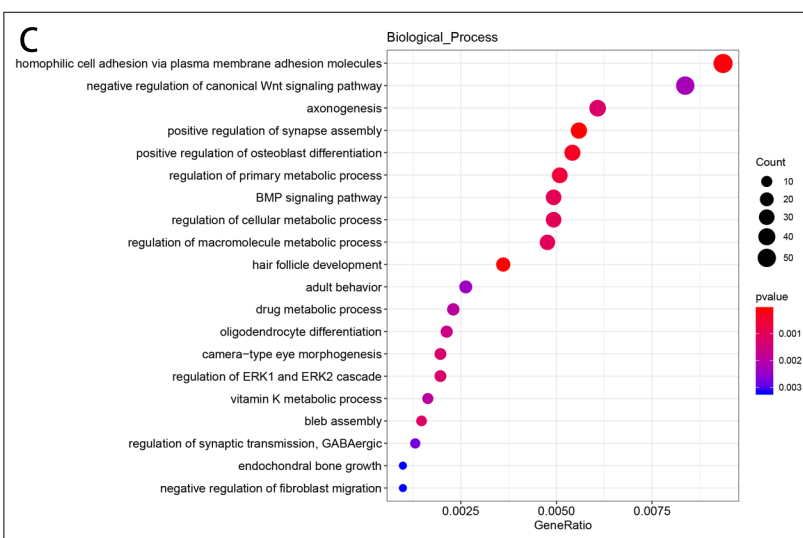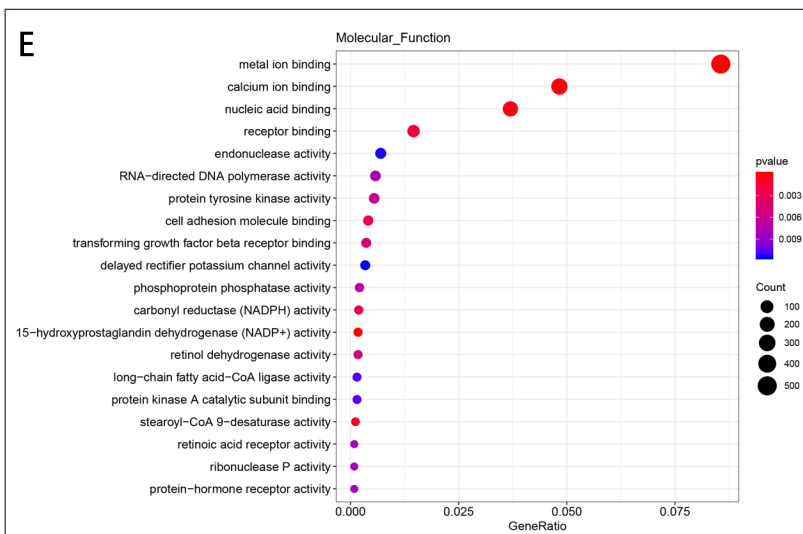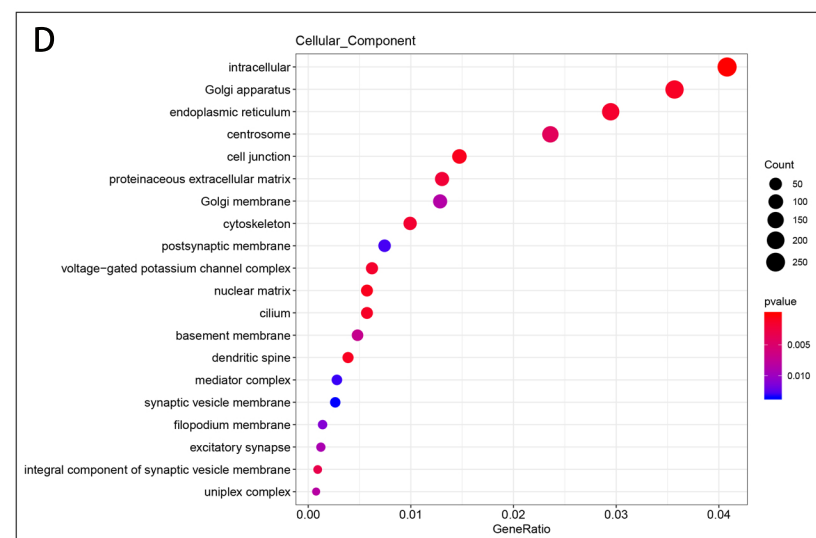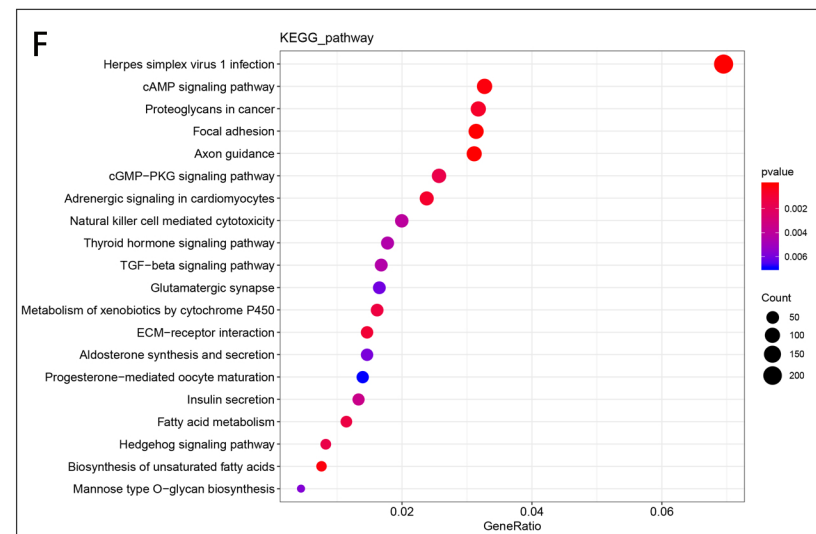

Supplement: Supplementary_Figure_3.pdf [file Supplementary_Figure_3.pdf]
